# Supplementary material for: Analysis of the distribution of organic compounds and drugs between biological tissues in the framework of solute partitioning in aqueous two-phase systems
Source: Royal Society of Chemistry journal article supplement (doi:10.1039/c6mb00608f), 2016-09-21
Supplement: c6mb00608f1.pdf [file c6mb00608f1.pdf]

## Supplementary Materials

### Analysis of Distribution of Organic Compounds and Drugs between Biological Tissues in the Framework of Solute Partitioning in Aqueous Two-Phase Systems

Luisa A. Ferreira <sup>1</sup>, Vladimir N. Uversky <sup>2,\*</sup>, Boris Y. Zaslavsky <sup>1,\*</sup>

- <sup>1</sup> Analiza, Inc., 3615 Superior Ave., Cleveland, OH 44114, USA; E-Mails: [Luisa.ferreira@cleveland-diagnostics.com](mailto:Luisa.ferreira@cleveland-diagnostics.com) (L.A.F.); [Boris.Zaslavsky@Cleveland-Diagnostics.com](mailto:Boris.Zaslavsky@Cleveland-Diagnostics.com) (B.Y.Z.)
- <sup>2</sup> Department of Molecular Medicine and Byrd Alzheimer's Research Institute, Morsani College of Medicine, University of South Florida, Tampa, FL 33612, USA; E-Mail: [vuversky@health.usf.edu](mailto:vuversky@health.usf.edu)
- \* Authors to whom correspondence should be addressed; V.N.U. E-Mail: [vuversky@health.usf.edu](mailto:vuversky@health.usf.edu); Tel.: +1-813-973-5816; Fax: +1-813-974-7357; B.Y.Z. E-Mail: [Boris.Zaslavsky@Cleveland-Diagnostics.com](mailto:Boris.Zaslavsky@Cleveland-Diagnostics.com); Tel.: +1- 216-432-9050 (ext. 111); Fax: +1-216-432-9050.

**Table S1.** *In vitro* air-tissue and blood-tissue distributions of various compounds analyzed in this study.<sup>1</sup>

| Compound               | log K (air-tissue) |           |           |          |            |           | log K (blood-tissue) |             |             |            |              |
|------------------------|--------------------|-----------|-----------|----------|------------|-----------|----------------------|-------------|-------------|------------|--------------|
|                        | Air-Adipose        | Air-Brain | Air-Liver | Air-Lung | Air-Muscle | Air-Blood | Blood-Adipose        | Blood-Brain | Blood-Liver | Blood-Lung | Blood-Muscle |
| neon                   |                    | -1.81     | -         | -        |            | -2.01     |                      | 0.2         |             |            |              |
| nitrous oxide          | 0.04               | -0.31     | -0.38     | -0.37    | -0.43      | -0.34     | 0.38                 | 0.03        | -0.04       | -0.03      | -0.09        |
| ethylbenzene           | 3.22               |           | 1.78      |          | 1.41       | 1.47      | 1.75                 |             | 0.31        |            | -0.06        |
| styrene                | 3.52               |           | 2.14      |          | 1.67       | 1.67      | 1.85                 |             | 0.47        |            | 0            |
| radon                  | 0.68               | -0.51     | -0.51     | -        | -0.81      | -0.39     | 1.07                 | -0.12       | -0.12       |            | -0.42        |
| m-methylstyrene        | 4.08               |           | 2.51      |          | 2.26       | 2.28      | 1.8                  |             | 0.23        |            | -0.02        |
| propylbenzene          |                    |           |           |          |            | 1.67      |                      |             |             |            |              |
| p-xylene               | 3.28               |           | 1.95      |          | 1.58       | 1.61      | 1.67                 |             | 0.34        |            | -0.03        |
| 1,2-dibromoethane      | 3.09               |           | 2.08      |          | 1.66       | 2.08      | 1.01                 |             | 0           |            | -0.42        |
| propyl bromide         | 2.37               |           | 0.91      |          | 0.62       | 0.97      | 1.4                  |             | -0.06       |            | -0.35        |
| butane                 |                    |           | -         | -        |            | -0.53     |                      |             |             |            |              |
| 1,3-butadiene          | 1.35               | -0.08     | 0.17      | -0.32    | -0.06      | 0.09      | 1.26                 | -0.17       | 0.08        | -0.41      | -0.15        |
| 1-bromo-2-chloroethane | 2.98               |           | 1.63      |          | 1.40       | 1.60      | 1.38                 |             | 0.03        |            | -0.2         |
| allyl chloride         | 2.00               |           |           |          | 1.04       | 1.24      | 0.76                 |             |             |            | -0.2         |
| 1,2-dichloroethane     | 2.54               |           | 1.55      |          | 1.37       | 1.39      | 1.15                 |             | 0.16        |            | -0.02        |
| 2-methylpentane        | 1.94               | 0.58      | 0.65      | -0.10    | 0.46       | -0.39     | 2.33                 | 0.97        | 1.04        | 0.29       | 0.85         |
| 2-pentanone            | 2.57               |           | 2.27      |          | 2.00       | 2.14      | 0.43                 |             | 0.13        |            | -0.14        |
| 1-methoxy-2-propanol   |                    |           |           |          |            | 4.09      |                      |             |             |            |              |
| 1-nitropropane         | 2.70               |           | 2.18      |          | 1.46       | 2.31      | 0.39                 |             | -0.13       |            | -0.85        |
| 4-methyl-2-pentanone   | 2.72               |           | 2.19      |          | 1.81       | 1.96      | 0.76                 |             | 0.23        |            | -0.15        |
| isopropyl acetate      | 2.48               | 1.95      | 2.17      |          | 1.85       | 1.55      | 0.93                 | 0.4         | 0.62        |            | 0.3          |
| m-xylene               | 3.29               |           | 1.96      |          | 1.62       | 1.59      | 1.7                  |             | 0.37        |            | 0.03         |
| 1,3,5-trimethylbenzene |                    |           |           |          |            | 1.64      |                      |             |             |            |              |
| bromobenzene           |                    |           |           |          |            | 1.72      |                      |             |             |            |              |
| methylcyclohexane      | 2.65               | 1.66      | 1.09      |          |            | 0.70      | 1.95                 | 0.96        | 0.39        |            |              |
| toluene                | 2.92               | 1.41      | 1.64      | 1.32     | 1.49       | 1.14      | 1.78                 | 0.27        | 0.5         | 0.18       | 0.35         |
| chlorobenzene          | 3.11               |           | 1.94      |          | 1.53       | 1.63      | 1.48                 |             | 0.31        |            | -0.1         |
| 2-isopropoxyethanol    |                    |           |           |          |            | 4.16      |                      |             |             |            |              |
| propyl acetate         | 2.71               | 2.00      | 2.36      |          | 1.93       | 1.88      | 0.83                 | 0.12        | 0.48        |            | 0.05         |
| pentane                | 1.60               | 0.34      | 0.32      | -0.3     | -0.15      | -0.29     | 1.89                 | 0.63        | 0.61        | -0.01      | 0.14         |

|                             |      |       |       |       |       |       |      |       |       |       |       |
|-----------------------------|------|-------|-------|-------|-------|-------|------|-------|-------|-------|-------|
| 1-chlorobutane              |      |       |       |       |       | 0.63  |      |       |       |       |       |
| 2-methoxyethanol            |      |       |       |       |       | 4.52  |      |       |       |       |       |
| divinyl ether               | 1.60 | 0.54  | 0.48  |       | 0.34  | 0.41  | 1.19 | 0.13  | 0.07  |       | -0.07 |
| ethyl formate               |      |       |       |       |       | 1.65  |      |       |       |       |       |
| furan                       | 1.81 |       | 0.77  |       |       | 0.82  | 0.99 |       | -0.05 |       |       |
| isobutyl acetate            | 3.05 | 2.14  | 2.42  |       | 2.04  | 1.69  | 1.36 | 0.45  | 0.73  |       | 0.35  |
| 2-heptanone                 | 3.66 |       | 2.63  |       | 2.33  | 2.33  | 1.33 |       | 0.3   |       | 0     |
| hexane                      | 2.12 | 0.89  | 0.69  | 0.00  | 0.58  | 0.21  | 1.91 | 0.68  | 0.48  | -0.21 | 0.37  |
| 2-ethoxyethanol             |      |       |       |       |       | 4.34  |      |       |       |       |       |
| cyclohexane                 | 2.44 |       | 1.05  | 0.43  | 0.52  | 0.17  | 2.27 |       | 0.88  | 0.26  | 0.35  |
| 1-hexanol                   |      |       |       |       |       | 3.21  |      |       |       |       |       |
| octane                      | 2.72 | 1.37  | 1.41  |       | 0.93  | 0.55  | 2.17 | 0.82  | 0.86  |       | 0.38  |
| 1-octene                    | 2.89 | 1.81  | 1.35  |       |       | 1.07  | 1.82 | 0.74  | 0.28  |       |       |
| 2-butoxyethanol             |      |       |       |       |       | 3.90  |      |       |       |       |       |
| nonane                      | 2.92 | 1.69  |       |       |       | 1.17  | 1.75 | 0.52  |       |       |       |
| undecane                    |      |       |       |       |       | 1.31  |      |       |       |       |       |
| dodecane                    |      |       |       |       |       | 1.39  |      |       |       |       |       |
| propene                     | 0.76 | -0.27 | -0.28 | -0.24 | -0.27 | -0.21 | 0.97 | -0.06 | -0.07 | -0.03 | -0.06 |
| dimethyl ether              |      |       |       |       |       | 1.16  |      |       |       |       |       |
| 1,1,2,4,4-pentafluorobutane |      |       |       |       |       | 0.87  |      |       |       |       |       |
| 3-methyl-1-butanol          | 3.18 | 2.79  | 2.97  |       | 2.90  | 2.75  | 0.43 | 0.04  | 0.22  |       | 0.15  |
| butyl acetate               | 3.18 | 2.22  | 2.45  |       | 2.20  | 1.94  | 1.24 | 0.28  | 0.51  |       | 0.26  |
| 1,4-dioxane                 |      |       |       |       |       | 3.27  |      |       |       |       |       |
| isopentyl acetate           | 3.44 | 2.34  | 2.55  |       | 2.32  | 1.79  | 1.65 | 0.55  | 0.76  |       | 0.53  |
| 1-nonene                    | 3.24 | 2.04  | 1.71  |       |       | 1.18  | 2.06 | 0.86  | 0.53  |       |       |
| decane                      | 3.05 |       | 2.09  |       |       | 1.17  | 1.88 |       | 0.92  |       |       |
| chlorodibromomethane        | 3.28 |       | 2.10  |       | 1.75  | 1.88  | 1.4  |       | 0.22  |       | -0.13 |
| teflurane                   | 1.30 | 0.05  | 0.01  |       | 0.34  | -0.22 | 1.52 | 0.27  | 0.23  |       | 0.56  |
| 2-chloro-1,3-butadiene      |      |       |       | 1.12  |       | 0.77  |      |       |       | 0.35  |       |
| tetrachloroethylene         | 3.21 |       | 1.85  | 1.86  | 1.30  | 1.19  | 2.02 |       | 0.66  | 0.67  | 0.11  |
| hydrogen                    |      |       |       |       | -1.76 | -1.77 |      |       |       |       | 0.01  |
| enflurane                   | 1.97 | 0.49  | 0.62  | 0.56  | 0.64  | 0.35  | 1.62 | 0.14  | 0.27  | 0.21  | 0.29  |
| ethyl acetate               | 2.18 | 1.90  | 2.03  |       | 1.84  | 1.90  | 0.28 | 0     | 0.13  |       | -0.06 |
| heptane                     | 2.51 | 0.94  | 0.96  | 0.40  | 0.85  | 0.50  | 2.01 | 0.44  | 0.46  | -0.1  | 0.35  |

|                                         |      |       |      |       |       |       |      |       |       |       |       |
|-----------------------------------------|------|-------|------|-------|-------|-------|------|-------|-------|-------|-------|
| halothane                               | 2.27 | 0.71  | 0.86 | 0.46  | 0.74  | 0.57  | 1.7  | 0.14  | 0.29  | -0.11 | 0.17  |
| cis-1,2-dichloroethene                  | 2.36 |       | 1.18 |       | 0.78  | 1.16  | 1.2  |       | 0.02  |       | -0.38 |
| trans-1,2-dichloroethene                | 2.17 |       | 0.95 |       | 0.55  | 0.88  | 1.29 |       | 0.07  |       | -0.33 |
| methyl tert-butyl ether                 | 1.97 | 1.54  | 1.35 |       | 1.57  | 1.18  | 0.79 | 0.36  | 0.17  |       | 0.39  |
| 1,1-dichloro-1-fluoroethane             | 1.56 |       | 0.52 |       | 0.02  | 0.32  | 1.24 |       | 0.2   |       | -0.3  |
| 1,2,4-trimethylcyclohexane              | 3.19 | 1.89  | 1.54 |       |       | 0.87  | 2.32 | 1.02  | 0.67  |       |       |
| sulfur hexafluoride                     |      | -1.78 |      | -2.14 | -1.85 | -2.17 |      | 0.39  |       | 0.03  | 0.32  |
| isoflurane                              | 1.92 | 0.39  | 0.56 | 0.20  | 0.31  | 0.20  | 1.72 | 0.19  | 0.36  | 0     | 0.11  |
| tricyclo[5.2.1.0 <sub>2,6</sub> ]decane | 4.01 |       | 2.74 |       |       | 1.76  | 2.25 |       | 0.98  |       |       |
| 1-chloro-1,2,2,2-tetrafluoroethane      |      |       |      |       |       | 0.18  |      |       |       |       |       |
| sevoflurane                             | 1.62 | 0.10  | 0.43 | 0.11  | 0.22  | -0.20 | 1.82 | 0.3   | 0.63  | 0.31  | 0.42  |
| cyclopentane                            |      |       |      |       |       | 0.24  |      |       |       |       |       |
| cycloheptane                            |      |       |      |       |       | 0.72  |      |       |       |       |       |
| allylbenzene                            |      |       |      |       |       | 1.71  |      |       |       |       |       |
| 2,2-dichloro-1,1,1-trifluoroethane      | 1.80 |       | 0.67 |       | 0.39  | 0.61  | 1.19 |       | 0.06  |       | -0.22 |
| t-butylcyclohexane                      | 3.17 | 1.77  | 1.68 |       |       | 1.16  | 2.01 | 0.61  | 0.52  |       |       |
| 2-methyloctane                          | 2.56 | 1.50  | 1.17 |       |       | 0.52  | 2.04 | 0.98  | 0.65  |       |       |
| 2-methylnonane                          | 2.84 |       |      |       |       | 0.76  | 2.08 |       |       |       |       |
| fluoroethane                            |      |       |      |       |       | 0.09  |      |       |       |       |       |
| 1-chloro-2,2-difluoroethene             | 1.30 | 0.04  | 0.04 | 0.00  | 0.00  | 0.06  | 1.24 | -0.02 | -0.02 | -0.06 | -0.06 |
| 1,1,2,2-tetrafluoroethane               |      |       |      |       |       | -0.12 |      |       |       |       |       |
| pentafluorobenzene                      |      |       |      |       |       | 0.51  |      |       |       |       |       |
| 1,2-difluorobenzene                     |      |       |      |       |       | 0.96  |      |       |       |       |       |
| 1,2,4-trifluorobenzene                  |      |       |      |       |       | 0.76  |      |       |       |       |       |
| 1,3,5-trifluorobenzene                  |      |       |      |       |       | 0.49  |      |       |       |       |       |
| 1,1,1,2,2,3,3,4,4-nonafluorobutane      |      |       |      |       |       | -1.52 |      |       |       |       |       |
| 1,1,2,2,3,3,4,4-octafluorobutane        |      |       |      |       |       | -0.36 |      |       |       |       |       |
| hexafluorobenzene                       |      |       |      |       |       | 0.39  |      |       |       |       |       |
| fluoroxene                              | 1.53 | 0.29  | 0.33 |       | 0.35  | 0.15  | 1.38 | 0.14  | 0.18  | --    | 0.2   |
| 2-fluoropropane                         |      |       |      |       |       | 0.06  |      |       |       |       |       |

|                              |      |      |      |       |      |       |       |       |       |       |       |
|------------------------------|------|------|------|-------|------|-------|-------|-------|-------|-------|-------|
| 1-fluoropropane              |      |      |      |       |      | 0.02  |       |       |       |       |       |
| cyanoethylene oxide          | 3.11 |      | 2.66 |       |      | 3.22  | -0.11 |       | -0.56 |       |       |
| fluorobenzene                |      |      |      |       |      | 1.06  |       |       |       |       |       |
| 1,2,3-trimethylbenzene       |      |      |      |       |      | 1.82  |       |       |       |       |       |
| 1,4-difluorobenzene          |      |      |      |       |      | 0.87  |       |       |       |       |       |
| 1-chloropropane              | 2.07 |      | 0.71 |       | 0.32 | 0.59  | 1.48  |       | 0.12  |       | -0.27 |
| 2,2,4-trimethylpentane       | 2.47 |      | 1.03 |       | 0.52 | 0.23  | 2.24  |       | 0.8   |       | 0.29  |
| 1,3-dichlorobenzene          |      |      |      |       |      | 2.30  |       |       |       |       |       |
| 1-chloropentane              |      |      |      |       |      | 0.87  |       |       |       |       |       |
| carbon tetrachloride         | 2.56 |      | 1.15 |       | 0.66 | 0.62  | 1.94  |       | 0.53  |       | 0.04  |
| 3-methylpentan-2-one         |      |      |      |       |      | 2.23  |       |       |       |       |       |
| 2,3,4-trimethylpentane       | 2.65 |      | 1.27 |       | 0.64 | 0.57  | 2.08  |       | 0.7   |       | 0.07  |
| desflurane                   |      |      |      |       |      | -0.37 |       |       |       |       |       |
| 1,2-dimethylcyclohexane      | 3.24 | 1.98 | 1.74 |       |      | 0.91  | 2.33  | 1.07  | 0.83  |       |       |
| 2-methylcyclohexanone        |      |      |      |       |      | 2.87  |       |       |       |       |       |
| 3-methylhexane               | 2.44 | 1.01 | 1.04 |       | 1.04 | 0.11  | 2.33  | 0.9   | 0.93  |       | 0.93  |
| 2-hexanone                   |      |      |      |       |      | 2.10  |       |       |       |       |       |
| 2-methylheptane              | 2.30 | 1.35 | 0.75 |       |      | 0.49  | 1.81  | 0.86  | 0.26  |       |       |
| vinyl bromide                | 1.69 |      | 0.52 |       | 0.35 | 0.49  | 1.2   |       | 0.03  |       | -0.14 |
| fluorochloromethane          | 1.19 |      | 0.54 |       | 0.39 | 0.71  | 0.48  |       | -0.17 |       | -0.32 |
| diethyl ether                | 1.74 | 1.10 | 0.94 | 1.14  | 0.87 | 1.11  | 0.63  | -0.01 | -0.17 | 0.03  | -0.24 |
| p-methylstyrene              | 4.05 |      | 2.51 |       | 2.26 | 2.37  | 1.68  |       | 0.14  |       | -0.11 |
| pentyl acetate               | 3.57 | 2.38 | 2.64 |       | 2.36 | 1.98  | 1.59  | 0.4   | 0.66  |       | 0.38  |
| carbon monoxide              |      |      |      | -1.69 |      | -1.67 |       |       |       | -0.02 |       |
| 1,1,1,2-tetrachloroethane    | 3.33 |      | 1.95 |       | 1.60 | 1.55  | 1.78  |       | 0.4   |       | 0.05  |
| ethyl tert-butyl ether       | 2.13 | 1.29 | 1.52 |       | 1.35 | 1.07  | 1.06  | 0.22  | 0.45  |       | 0.28  |
| ethanol                      | 2.34 | 3.15 |      | 3.07  | 3.08 | 3.27  | -0.93 | -0.12 |       | -0.2  | -0.19 |
| methanol                     | 2.33 |      |      | 3.24  |      | 3.41  | -1.08 |       |       | -0.17 |       |
| 2-propanol                   | 2.35 | 2.91 | 2.99 | 2.77  | 2.87 | 3.02  | -0.67 | -0.11 | -0.03 | -0.25 | -0.15 |
| propanone                    | 1.91 | 2.19 | 2.38 | 2.20  | 2.21 | 2.36  | -0.45 | -0.17 | 0.02  | -0.16 | -0.15 |
| chloroform                   | 2.38 | 1.30 | 1.28 | 1.12  | 1.12 | 1.15  | 1.23  | 0.15  | 0.13  | -0.03 | -0.03 |
| hexachloroethane             | 3.52 |      | 2.57 |       | 1.88 | 1.76  | 1.76  |       | 0.81  |       | 0.12  |
| halopropane                  | 2.35 |      |      |       |      | 0.75  | 1.6   |       |       |       |       |
| 1,1,2,2,3-pentafluoropropane |      |      |      |       |      | -0.48 |       |       |       |       |       |

|                        |       |       |       |       |       |       |       |       |       |       |       |
|------------------------|-------|-------|-------|-------|-------|-------|-------|-------|-------|-------|-------|
| 1-propanol             | 2.54  | 2.98  | 3.11  | 2.91  | 2.95  | 3.06  | -0.52 | -0.08 | 0.05  | -0.15 | -0.11 |
| 1-butanol              | 2.95  | 3.06  | 3.10  |       | 2.95  | 3.08  | -0.13 | -0.02 | 0.02  |       | -0.13 |
| 1-pentanol             | 3.41  | 3.03  | 3.24  |       | 2.91  | 2.83  | 0.58  | 0.2   | 0.41  |       | 0.08  |
| benzene                | 2.64  | 1.25  | 1.26  | 1.08  | 1.11  | 1.05  | 1.59  | 0.2   | 0.21  | 0.03  | 0.06  |
| 1,1,1-trichloroethane  | 2.41  | 0.92  | 1.07  | 0.67  | 0.67  | 0.63  | 1.78  | 0.29  | 0.44  | 0.04  | 0.04  |
| krypton                | -0.48 | -1.38 | -1.14 |       | -1.38 | -1.22 | 0.74  | -0.16 | 0.08  |       | -0.16 |
| argon                  |       | -1.49 |       |       | -1.64 | -1.52 |       | 0.03  |       |       | -0.12 |
| helium                 |       |       |       | -1.98 | -1.93 | -2.00 |       |       |       | 0.02  | 0.07  |
| xenon                  | 0.26  | -0.70 | -1.00 |       | -1.00 | -0.85 | 1.11  | 0.15  | -0.15 |       | -0.15 |
| methane                |       | -1.39 |       |       | -1.41 | -1.42 |       | 0.03  |       |       | 0.01  |
| ethane                 |       |       |       | -1.28 |       | -1.02 |       |       |       | -0.26 |       |
| Ethene                 | 0.20  | -0.23 | -0.30 | -0.25 | -0.20 | -0.53 | 0.73  | 0.3   | 0.23  | 0.28  | 0.33  |
| acetylene              |       |       |       | -0.06 | 0.03  | -0.06 |       |       |       | 0     | 0.09  |
| methyl chloride        | 1.13  |       | 0.54  |       | -0.01 | 0.31  | 0.82  |       | 0.23  |       | -0.32 |
| dibromomethane         | 2.90  |       | 1.83  |       | 1.61  | 1.87  | 1.03  |       | -0.04 |       | -0.26 |
| bromochloromethane     | 2.51  |       | 1.47  |       | 1.05  | 1.21  | 1.3   |       | 0.26  |       | -0.16 |
| chloroethane           | 1.59  |       | 0.56  |       | 0.51  | 0.49  | 1.1   |       | 0.07  |       | 0.02  |
| vinyl chloride         | 1.30  |       | 0.20  |       | 0.32  | 0.17  | 1.13  |       | 0.03  |       | 0.15  |
| iodoethane             |       |       |       |       |       | 0.83  |       |       |       |       |       |
| dichloromethane        | 2.01  | 0.78  | 1.01  | 0.76  | 0.79  | 1.12  | 0.89  | -0.34 | -0.11 | -0.36 | -0.33 |
| difluoromethane        | 0.16  |       | 0.44  |       | 0.16  | 0.20  | -0.04 |       | 0.24  |       | -0.04 |
| carbon disulfide       |       | 0.90  | 0.78  |       |       | 0.30  |       | 0.6   | 0.48  |       |       |
| cyclopropane           | 0.99  | -0.10 | -0.19 | -0.51 | -0.31 | -0.21 | 1.2   | 0.11  | 0.02  | -0.3  | -0.1  |
| ethylene oxide         | 1.64  | 1.81  | 1.73  | 1.79  | 1.75  | 1.80  | -0.16 | 0.01  | -0.07 | -0.01 | -0.05 |
| tribromomethane        |       |       |       |       |       | 2.15  |       |       |       |       |       |
| isopropyl bromide      | 2.20  |       | 0.64  |       | 0.61  | 0.64  | 1.56  |       | 0     |       | -0.03 |
| bromodichloromethane   | 2.72  |       | 1.49  |       |       | 1.49  | 1.23  |       | 0     |       | --    |
| 2-chloropropane        | 1.84  |       | 0.50  |       | 0.31  | 0.32  | 1.52  |       | 0.18  |       | -0.01 |
| 1,1-dichloroethane     | 2.21  |       | 1.03  |       | 0.71  | 0.88  | 1.33  |       | 0.15  |       | -0.17 |
| 1,1-dichloroethylene   | 1.84  |       | 0.65  |       | 0.31  | 0.70  | 1.14  |       | -0.05 |       | -0.39 |
| 1,1-difluoroethane     |       |       |       |       |       | 0.42  |       |       |       |       |       |
| 1,1-difluoroethene     | -0.10 |       | -0.10 |       | -0.54 | -0.74 | 0.64  |       | 0.64  |       | 0.2   |
| propylene oxide        |       |       |       |       |       | 1.80  |       |       |       |       |       |
| 2-methyl-2-propanol    | 2.20  | 2.79  | 2.69  |       | 2.80  | 2.68  | -0.48 | 0.11  | 0.01  |       | 0.12  |
| fluorotrichloromethane |       |       |       |       |       | -0.06 |       |       |       |       |       |

|                                    |       |       |      |       |      |       |       |       |       |       |       |       |
|------------------------------------|-------|-------|------|-------|------|-------|-------|-------|-------|-------|-------|-------|
| difluorodichloromethane            |       |       |      |       |      | -0.82 |       |       |       |       |       |       |
| carbon tetrafluoride               |       |       |      |       |      | -1.10 |       |       |       |       |       |       |
| 2,2-dimethylbutane                 | 1.82  | 0.45  | 0.54 | -0.22 | 0.00 | -0.59 | 2.41  | 1.04  | 1.13  | 0.37  | 0.59  |       |
| tert-amyl alcohol                  | 2.66  | 2.66  | 2.68 |       | 2.59 | 2.59  | 0.07  | 0.07  | 0.09  |       | 0     |       |
| 2-chloro-1,1,1-trifluoroethane     | 1.43  | 0.26  | 0.31 | 0.34  | 0.22 | 0.14  | 1.29  | 0.12  | 0.17  | 0.2   | 0.08  |       |
| 1,1,1,2,3,3,4,4,4-octafluorobutane |       |       |      |       |      | -0.59 |       |       |       |       |       |       |
| pentachloroethane                  | 3.61  |       | 2.41 |       | 1.86 | 2.02  | 1.59  |       | 0.39  |       |       | -0.16 |
| 1,2-dichlorotetrafluoroethane      |       |       |      |       |      | -0.82 |       |       |       |       |       |       |
| methoxyflurane                     | 2.90  | 1.40  | 1.47 | 1.20  | 1.35 | 1.28  | 1.62  | 0.12  | 0.19  | -0.08 | 0.07  |       |
| 2,3,4,5,6-pentafluorotoluene       |       |       |      |       |      | 0.73  |       |       |       |       |       |       |
| nitrogen                           | -1.27 | -1.80 |      |       |      | -1.83 | 0.56  | 0.03  |       |       |       |       |
| oxygen                             |       |       |      | -1.62 |      | -1.58 |       |       |       | -0.04 |       |       |
| isophorone                         |       |       |      |       |      | 3.37  |       |       |       |       |       |       |
| 2-methyl-1,3-butadiene             | 1.84  |       | 0.42 |       | 0.26 | 0.10  | 1.74  |       | 0.32  |       | 0.16  |       |
| 2-methyl-1-propanol                | 2.73  | 2.78  | 2.94 | 2.60  | 2.74 | 2.92  | -0.19 | -0.14 | 0.02  | -0.32 | -0.18 |       |
| 1,2-dichloropropane                | 2.70  |       | 1.39 |       | 1.08 | 1.14  | 1.56  |       | 0.25  |       | -0.06 |       |
| butan-2-one                        | 2.26  | 2.07  | 2.36 | 2.01  | 2.14 | 2.24  | 0.02  | -0.17 | 0.12  | -0.23 | -0.1  |       |
| 1,1,2-trichloroethane              | 3.16  |       | 1.86 |       | 1.36 | 1.67  | 1.49  |       | 0.19  |       | -0.31 |       |
| trichloroethene                    | 2.75  | 1.25  | 1.41 | 1.15  | 1.13 | 1.14  | 1.61  | 0.11  | 0.27  | 0.01  | -0.01 |       |
| methyl acetate                     | 2.00  | 1.85  | 1.95 |       | 1.81 | 1.98  | 0.02  | -0.13 | -0.03 |       | -0.17 |       |
| 2,3-dimethylbutane                 |       |       |      |       |      | 0.78  |       |       |       |       |       |       |
| 1,1,2,2-tetrachloroethane          | 3.58  |       | 2.29 |       | 2.00 | 2.13  | 1.45  |       | 0.16  |       | -0.13 |       |
| 2-nitropropane                     | 2.19  |       | 1.80 |       | 1.46 | 2.23  | -0.04 |       | -0.43 |       | -0.77 |       |
| 1,1,1,2-tetrafluoroethane          |       |       |      |       |      | -0.25 |       |       |       |       |       |       |
| 2-methylnonane                     |       | 1.81  | 1.45 |       |      |       |       |       |       |       |       |       |
| 1-decene                           | 3.36  | 2.17  | 1.98 |       |      | 1.21  | 2.15  | 0.96  | 0.77  |       |       |       |
| ethyl tert-pentyl ether            |       |       |      |       |      | 1.25  |       |       |       |       |       |       |
| 1,2-epoxy-3-butene                 | 2.23  |       | 1.74 |       | 1.66 | 1.97  | 0.26  |       | -0.23 |       | -0.31 |       |
| o-xylene                           | 3.20  | 1.39  | 1.76 | 1.94  | 1.71 | 1.42  | 1.78  | -0.03 | 0.34  | 0.52  | 0.29  |       |
| 1,2-dichlorobenzene                |       |       |      |       |      | 2.63  |       |       |       |       |       |       |
| 1,2,4-trimethylbenzene             | 3.25  | 1.63  | 2.20 |       |      | 1.85  | 1.4   | -0.22 | 0.35  |       |       |       |
| 3-methylpentane                    | 2.01  | 0.64  | 0.69 | -0.05 | 0.58 | -0.37 | 2.38  | 1.01  | 1.06  | 0.32  | 0.95  |       |

|                          |      |       |       |       |       |       |      |       |       |       |       |
|--------------------------|------|-------|-------|-------|-------|-------|------|-------|-------|-------|-------|
| 1,2,3-trichloropropane   |      |       |       |       |       | 2.01  |      |       |       |       |       |
| 3-pentanone              |      |       |       |       |       | 2.21  |      |       |       |       |       |
| methylcyclopentane       | 2.25 | 0.86  | 0.89  | 0.23  | 0.70  | -0.07 | 2.32 | 0.93  | 0.96  | 0.3   | 0.77  |
| tert-butylbenzene        | 3.26 | 1.67  | 2.32  |       |       | 1.24  | 2.02 | 0.43  | 1.08  |       |       |
| 4-chlorobenzotrifluoride | 2.99 | 1.60  | 1.71  | 1.63  |       | 1.43  | 1.56 | 0.17  | 0.28  | 0.2   |       |
| isopropylbenzene         |      |       |       |       |       | 1.57  |      |       |       |       |       |
| tert-amyl methyl ether   | 2.52 | 1.39  | 1.50  |       | 1.38  | 1.22  | 1.3  | 0.17  | 0.28  |       | 0.16  |
| neon                     |      | -1.81 | -     | -     |       | -2.01 |      | 0.2   |       |       |       |
| nitrous oxide            | 0.04 | -0.31 | -0.38 | -0.37 | -0.43 | -0.34 | 0.38 | 0.03  | -0.04 | -0.03 | -0.09 |
| ethylbenzene             | 3.22 |       | 1.78  |       | 1.41  | 1.47  | 1.75 |       | 0.31  |       | -0.06 |
| styrene                  | 3.52 |       | 2.14  |       | 1.67  | 1.67  | 1.85 |       | 0.47  |       | 0     |
| radon                    | 0.68 | -0.51 | -0.51 | -     | -0.81 | -0.39 | 1.07 | -0.12 | -0.12 |       | -0.42 |
| m-methylstyrene          | 4.08 |       | 2.51  |       | 2.26  | 2.28  | 1.8  |       | 0.23  |       | -0.02 |
| propylbenzene            |      |       |       |       |       | 1.67  |      |       |       |       |       |
| p-xylene                 | 3.28 |       | 1.95  |       | 1.58  | 1.61  | 1.67 |       | 0.34  |       | -0.03 |



**Table S2.** *In vivo* tissue-blood distribution of drugs in rat analyzed in this study.<sup>2</sup>

| Drug                             | Rat tissue-blood distribution of drugs <i>in vivo</i> |         |         |          |           |         |        |         |          |         |           |         |          |       |
|----------------------------------|-------------------------------------------------------|---------|---------|----------|-----------|---------|--------|---------|----------|---------|-----------|---------|----------|-------|
|                                  | Muscle                                                | Bone    | Brain   | Heart    | Intestine | Skin    | Lungs  | Spleen  | Adipose  | Liver   | Kidney    | Stomach | Pancreas | log P |
| 5-butyl-5-ethyl barbituric acid  | -0.0706                                               |         | -0.0655 | 0.0128   | -8.77E-03 | -0.1079 | -0.102 | -0.2366 | -0.0132  | 0.1931  | 0.3784    | -0.0362 | -0.3188  |       |
| 5-heptyl-5-ethyl barbituric acid | 0.1818                                                |         | 0.0864  | 0.1492   | 0.1038    | 0.2068  | 0.045  | 0.0453  | 0.7959   | 0.4249  | 0.3263    | 0.4857  | 0.2068   |       |
| 5-hexyl-5-ethyl barbituric acid  | 0.2553                                                |         | 0.2455  | 0.2279   | 0.2068    | 0.3444  | 0.033  | 0       | 0.8859   | 0.525   | 0.356     | 0.4786  | 0.2068   |       |
| 5-methyl-5-ethyl barbituric acid | -0.1427                                               |         | -0.2007 | -0.1612  | -0.2366   | -0.0862 | -0.131 | -0.1938 | -0.6021  | 0.1959  | 0.1038    | -0.585  | -0.3098  |       |
| 5-nonyl-5-ethyl barbituric acid  | 0.0899                                                |         | 0.42    | 0.0828   | 0.3222    | 0.5775  | 0.554  | 0.4983  | 0.8627   | 0.6758  | 0.3139    | 0.5478  | 0.4609   |       |
| 5-octyl-5-ethyl barbituric acid  | 0.0453                                                |         | 0.3444  | 0.1761   | 0.1673    | 0.5145  | 0.528  | 0.3032  | 0.7882   | 0.7284  | 0.444     | 0.2788  | 0.4116   |       |
| 5-pentyl-5-ethyl barbituric acid | 0.0414                                                |         | -0.1612 | 0.0294   | -0.0506   | -0.1427 | -0.119 | -0.2441 | 0.2304   | 0.2095  | 0.2279    | 0.017   | -0.1192  |       |
| 5-propyl-5-ethyl barbituric acid | 0.0969                                                |         | -0.0223 | 4.32E-03 | -0.0757   | 0.0334  | 0.053  | -0.0809 | -0.0605  | 0.29    | 0.4713    | -0.2076 | -0.1612  |       |
| Acebutolol                       | 0.6513                                                |         | -0.4089 | 0.6758   | 1.933     | 0.415   | 0.89   |         | -0.0757  | 1.4265  | 1.4314    |         |          | 1.53  |
| Alfentanyl                       | -0.2924                                               | -1.3979 | -0.6383 | -0.041   | 0.601     | -0.4685 | 0.111  | 0.1335  | 0.5988   | 0.2742  | 0.1903    |         | 0.2553   | 2.81  |
| Alprazolam                       | 0.3385                                                |         | 0.1987  |          | 0.1399    | 0.281   |        |         | 4.32E-03 | 0.8463  | 0.4249    |         |          | 3.02  |
| Barbital                         | -0.0862                                               |         | -0.1739 | -0.1367  | -0.2291   | -0.0809 | -0.071 | -0.1938 | -0.3468  | 0.3385  | 0.2279    | -0.5528 | -0.3279  | 1.45  |
| Betaxolol                        | 0.8376                                                |         | 0.8156  | 1.0531   | 1.2923    | 0.4997  | 1.988  |         | 0.1644   | 1.7796  | 1.4533    |         |          | 2.54  |
| Biperiden                        | 0.5224                                                | 0.8169  | 0.8382  | 0.8463   | 1.017     | 0.5809  | 1.753  |         | 1.7796   |         | 1.0086    |         |          | 3.54  |
| Bisoprolol                       | 0.5933                                                | 0.2923  | 0.0969  | 0.683    | 1.281     | 0.2068  | 1.489  |         | -0.1249  | 1.2253  | 1.2601    |         |          | 2.2   |
| Carvedilol                       | 0.1206                                                | 0.5328  |         | 0.7853   |           |         |        | 0.8222  |          | 0.932   | 0.716     |         |          | 3.42  |
| Cefazolin                        | -0.6576                                               |         |         | -0.7212  | -0.4089   | -0.2007 | -0.377 |         |          | 0.2788  | 0.8267    |         |          | 1.52  |
| Ceftazidime                      | -0.7212                                               | -0.6383 |         | -0.6576  | -0.3872   | -0.4089 | -0.357 |         | -0.7959  | -0.6021 | 0.6884    |         |          | -4.55 |
| Chlordiazepoxide                 | -0.2596                                               |         | -0.2757 | 0.2718   | 0.1492    | -0.4685 |        |         | 0.49     | 0.5416  | 0.2878    |         |          | 0.03  |
| Cisapride                        |                                                       |         | 0.1461  | 0.238    |           |         | 0.988  |         |          | 1.1875  | 0.8189    |         |          | 2.49  |
| Cotinine                         | -0.1612                                               |         | -0.3468 | -0.2924  | -0.2218   |         | -0.237 |         | -1.0969  | -0.1938 | -4.36E-03 |         |          | 0.21  |
| Decane                           | 0.7202                                                |         | 1.0334  |          |           |         |        |         | 1.4216   | 1.0334  |           |         |          | 4.91  |
| Deltamethrin                     | 1.5159                                                |         | 0.1106  |          | 0.4116    |         |        |         | 2.4579   | 0.4116  |           |         |          | 5.74  |
| Diazepam                         | 0.3541                                                |         | 0.3096  | 0.6937   | 0.5911    | 0.7332  | 0.66   |         | 1.415    | 0.7966  | 0.6618    |         |          | 3.08  |
| Dicloxacillin                    | -1.301                                                |         |         | -1.1549  |           |         | -0.921 | -1.0458 |          |         |           |         |          | 2.91  |
| Dideoxyinosine                   | -0.1612                                               |         | -0.7696 |          | -0.2924   |         |        | -0.1739 |          | -0.1192 | 0.8357    |         | -0.1487  | 0.04  |
| Digoxin                          | 0.0828                                                |         |         | 0.2068   | 0.7543    |         | 0.303  |         |          | 1.1644  | 0.2967    |         |          | 2.37  |
| Domperidone                      | 0.4298                                                |         | -1.0458 | 0.48     |           |         | 0.901  |         |          | 1.0294  | 1.243     |         |          | 4.25  |
| Enoxacin                         | 0.1875                                                |         |         | 0.0531   |           | 0.1584  | 0.083  | 0.238   |          | 0.5328  | 0.6902    |         |          | -0.98 |
| Etodolac                         |                                                       | 0.1847  | -1.0458 | -0.1938  |           |         |        |         | -0.6198  | -0.301  | -0.3188   |         |          | 3.44  |

|                      |         |         |         |         |         |          |         |         |         |         |         |        |         |       |
|----------------------|---------|---------|---------|---------|---------|----------|---------|---------|---------|---------|---------|--------|---------|-------|
| Fentanyl             | 0.5635  |         | 0.6212  | 0.7275  | 1.0128  | 0.4116   | 1.204   | 1.534   | 1.5198  | 0.6532  | 1.1553  |        | 1.4216  | 3.82  |
| Fingolimod           | 1.0212  |         | 1.692   | 1.2405  |         |          | 1.834   | 1.7931  |         | 1.6721  | 1.5539  |        |         | 4.06  |
| Fleroxacin           | 0.1903  |         |         | 0.2945  |         |          | 0.22    |         |         |         |         |        |         | 1.12  |
| Flunitrazepam        | -0.1192 | -0.0315 | 0.1367  | -0.0223 | 0.601   |          |         |         | 1.7723  | 0.48    | -0.4815 |        |         | 2.55  |
| Ftorafur             | -0.0458 |         | -0.1367 | -0.1612 | -0.1871 | -0.1427  | -0.337  | -0.1192 | -0.5086 | -0.1549 | 0.0899  |        | -0.4437 | 0.02  |
| Galanthamine         | 0.3118  |         | 0.1614  |         |         |          |         |         |         | 0.3856  | 1.1239  |        |         | 1.16  |
| Glycyrrhetic acid    | -0.7447 |         | -1.1549 | -0.6778 |         |          | -0.5376 | -0.398  | -0.8861 |         |         |        |         | 6.03  |
| Glycyrrhizin         | -1      |         |         | -1.3979 |         |          | -0.5528 | -1      |         |         |         |        |         | 3.13  |
| Hexobarbital         | -0.1024 |         |         | 0.1139  | 0.1523  | -0.0362  | 0.449   |         | 0.2148  | 0.7752  | 0.179   |        |         | 1.25  |
| Imipramine           | 0.7218  |         | 1.1038  | 1.1173  | 1.1461  |          |         | 1.883   | 1.5353  | 0.7987  | 1.4914  | 1.4362 | 1.4166  | 4.28  |
| Inaperisone          | 0.3385  |         | 0.8156  | 0.5944  |         |          | 0.525   | 1.248   |         | 0.9159  | 1.2553  | 1.4886 |         | 3.57  |
| Laniquidar           | 0.9513  |         | 0.5587  | 0.8669  |         |          |         | 1.689   |         |         | 1.3263  | 1.179  |         | 6.28  |
| Lidocaine            | 0.1206  |         | 0.4065  | 0.3304  | 0.3892  | 0.3075   | 0.476   | 0.5763  |         | 0.9571  | 2.1303  |        |         | 0.92  |
| Lomefloxacin         | 0.2253  | 0.2148  | -0.6576 | 0.1523  | 0.2279  | -0.0132  | 0.111   | 0.2553  | -0.5686 | 0.3784  | 0.7024  |        |         | -0.39 |
| Lorcainide           | 0.3711  |         | 0.1004  | 0.382   |         |          |         | 1.207   |         |         | -0.3279 | 0.6739 |         | 4.31  |
| Lubeluzole           | 0.4281  |         | 0.7348  |         |         |          |         | 1.377   |         |         | 1.5611  | 1.1139 |         | 4.23  |
| Matrine              | 0.1271  |         | 0.3139  | 0.1875  | 0.49    |          | 0.188   | 0.8122  | -0.3372 | 0.7536  | 1.0128  |        |         | 1.08  |
| Metoprolol           | 0.5682  | 0.5391  | 0.6464  | 0.6365  | 0.902   | 0.3032   | 1.236   |         | -0.1805 | 1.4456  | 1.2455  |        |         | 1.76  |
| Midazolam            | 0.1139  |         | 0.4757  | 0.4814  | 0.4829  | 0.4249   | 0.513   | 0.3692  | 0.776   | 1.0531  | 0.5079  | 0.4871 |         | 3.97  |
| Miloxacin            |         |         | -0.9208 |         |         |          |         | -0.292  | -0.4815 |         |         |        |         | 1.15  |
| Molinate             | 0.6201  |         |         |         |         |          |         |         | 2.2504  | 1.1492  |         |        |         | 1.89  |
| Nalidixic acid       | -0.4559 | -0.5528 | -0.6778 | -0.3188 | -0.3188 | -0.4685  | -0.495  | -0.4815 | -1.0458 | -0.2441 | -0.2757 |        |         | 1.01  |
| Nebivolol            | 0.3617  |         | 0.4639  | 0.5647  |         |          |         | 1.891   |         | 1.0414  | 0.918   |        |         | 3.21  |
| Nicotine             | 0.2175  |         | 0.4378  | 0.2355  | 0.301   | 0.1072   | 0.243   |         | -0.3279 | 0.6821  | 1.2504  |        |         | 1.16  |
| o-Ethoxybenzamide    | -0.1024 |         | -0.0269 | 0       | -0.2441 | 4.32E-03 | -0.036  | -0.0655 | -0.1549 |         | 0.1106  |        |         | 1.02  |
| Ofloxacin            | 0.2695  | 0.1875  | -0.6021 | 0.2856  |         |          | 0.1106  | 0.167   | 0.3201  | -0.699  | 0.3444  | 0.8414 |         | 0.65  |
| Oxprenolol           | 0.6551  | 0.4409  | 0.3747  | 0.7218  | 1.2095  | 0.3032   | 1.384   |         | -0.0809 | 1.1303  | 1.3139  |        |         | 2.17  |
| Pefloxacin           | 0.4099  |         | -0.7696 | 0.3979  |         |          |         | 0.314   | 0.5599  |         | 0.7543  | 0.6425 |         | 0.88  |
| Penicillin           | -0.9586 |         |         | -0.7696 | 0.243   |          |         | -0.553  | -0.7696 |         | -0.3468 | 0.828  |         | 1.08  |
| Pentazocine          | 0.6149  | 0.5798  | 0.4829  | 0.5798  | 0.5119  | 0.5119   | 1.279   |         |         | 0.2405  | 0.243   | 1.1818 |         | 3.89  |
| Perchloroethylene    | 0.2648  |         | 0.4728  |         |         |          |         |         |         | 2.0719  | 0.4099  | 0.3802 |         | 2.62  |
| Phencyclidine        | 0.1303  |         | 0.3598  | 0.29    |         |          |         | 1.562   |         | 1.7396  | 0.8555  | 1.0212 |         | 4.49  |
| Phenobarbital        | -0.0862 |         |         | -0.0915 | 0.1072  | 4.32E-03 | -0.201  |         | -0.6383 | 0.1818  | -0.2147 |        |         | 2.14  |
| Phenytoin            | -0.0969 |         | -0.1427 | -0.0969 | 0.1903  | 0.0414   | -0.125  |         | 0.2175  | 0.3579  | 0.1987  |        |         | 3.4   |
| Pindolol             | 0.7745  | 0.29    | 0.5944  | 0.9652  | 1.243   | 0.3324   | 1.393   |         | -0.2218 | 0.9455  | 1.49    |        |         | 1.69  |
| Pipemidic acid       | 0.1461  | 0.3784  | -0.8861 | 0       |         |          |         | 0.068   | 0.1875  | -0.4437 | 0.6893  | 0.8965 |         | -1.77 |
| p-Phenylbenzoic acid | -0.8539 |         | -1      | -0.3872 | -0.5686 | -0.5686  | -0.301  | -0.7447 |         |         |         |        |         | 3.28  |
| Procainamide         | 0.49    |         |         | 0.3909  |         |          |         |         | -0.9208 | 0.5011  | 0.8028  |        |         | 0.95  |
| Propranolol          | 0.6628  | 0.6739  | 1.238   | 0.9657  | 1.2833  | 0.5623   | 1.762   |         | 0.2989  | 1.29    | 1.1303  |        |         | 2.58  |
| Prucalopride         | 0.4771  |         | -0.5528 | 0.4502  |         |          |         | 0.843   |         |         | 0.7604  | 1.0607 |         | 0.74  |
| Pseudocumene         | 0.0828  |         | 0.4031  |         |         |          |         |         |         | 1.7973  | 0.4031  |        |         | 3.51  |
| Quinidine            | 0.4857  |         | -0.1938 | 0.617   | 0.8579  |          |         | 1.486   | 1.2304  |         | 1.0682  | 1.1673 |         | 2.51  |
| Ritanserin           | 0.6075  |         | 0.4698  |         |         |          |         | 1.508   |         |         | 1.3979  | 1.1492 |         | 5.31  |

|                                  |         |         |         |          |           |         |        |         |          |         |           |         |         |       |
|----------------------------------|---------|---------|---------|----------|-----------|---------|--------|---------|----------|---------|-----------|---------|---------|-------|
| Sabeluzole                       |         |         | 0.8055  |          |           |         | 1.54   |         |          | 1.6513  | 1.0899    |         |         | 4.09  |
| Salicylic acid                   | -0.6021 | -0.585  | -1.0458 | -0.4685  | -0.4202   | -0.3098 | -0.456 |         |          | -0.3768 | -0.0915   |         |         | 1.98  |
| Styrene                          | -0.0655 |         |         |          |           |         | -0.194 |         | 1.6117   | 0.0719  |           |         |         | 2.71  |
| Sufentanyl                       | 0.3927  |         | 0.4771  | 0.415    |           |         | 0.951  |         |          | -0.1739 | 0.2279    |         |         | 3.61  |
| Tenoxicam                        | -1.0969 | -1      | -2      | -0.7447  | -0.699    | -0.8239 | -0.509 | -1.1549 | -1.5229  | 0.0607  | 0.017     |         | -0.9208 | 1.22  |
| Tetracycline                     | 0.301   | 0.9504  |         |          | 0.574     |         |        |         | 0.0414   | 0.6721  | 0.6075    |         |         | -3.47 |
| Theophylline                     | -0.2147 |         | -0.4437 |          |           |         | -0.143 |         |          |         |           |         |         | -0.81 |
| Thiopental                       | -0.1427 |         | -0.1308 | 0.0792   | 0.1335    | 0.1492  | 0.124  | -0.2147 | 0.8169   | 0.5302  | 0.4133    |         | 0.0253  | 2.78  |
| Timolol                          | 0.5763  | -0.0458 | -0.0177 | 0.6866   | 1.2625    | 0.1553  | 1.389  |         | -0.2366  | 0.8579  | 1.0828    |         |         | 1.34  |
| Tolbutamide                      | -0.8239 |         | -0.9586 | -0.4815  | -0.8539   | -0.5528 | -0.482 | -0.6576 | -0.8539  | -0.7696 | -0.7959   |         | -0.7447 | 3.11  |
| Triazolam                        | 0.6064  |         |         |          | 0.902     | 0.5635  |        |         | 0.6064   | 0.3997  | 0.752     |         |         | 3.63  |
| Valproic acid                    | -0.6778 |         | -0.4685 | -0.2366  | -0.2147   | -0.1938 | -0.244 |         | -0.699   | 0.3909  | 0.3118    |         |         | 2.8   |
| Verapamil                        | 0.6138  |         |         | 0.8482   |           |         | 1.769  |         |          |         | 1.1673    |         |         | 5.04  |
| Zearalenone                      | -0.3665 |         | 0.0253  | 0.0645   | 1.5775    |         | 0.364  | -0.0915 | 0.5198   | 0.659   | -0.2596   | 0.1139  |         | 4.37  |
| 5-butyl-5-ethyl barbituric acid  | -0.0706 |         | -0.0655 | 0.0128   | -8.77E-03 | -0.1079 | -0.102 | -0.2366 | -0.0132  | 0.1931  | 0.3784    | -0.0362 | -0.3188 |       |
| 5-heptyl-5-ethyl barbituric acid | 0.1818  |         | 0.0864  | 0.1492   | 0.1038    | 0.2068  | 0.045  | 0.0453  | 0.7959   | 0.4249  | 0.3263    | 0.4857  | 0.2068  |       |
| 5-hexyl-5-ethyl barbituric acid  | 0.2553  |         | 0.2455  | 0.2279   | 0.2068    | 0.3444  | 0.033  | 0       | 0.8859   | 0.525   | 0.356     | 0.4786  | 0.2068  |       |
| 5-methyl-5-ethyl barbituric acid | -0.1427 |         | -0.2007 | -0.1612  | -0.2366   | -0.0862 | -0.131 | -0.1938 | -0.6021  | 0.1959  | 0.1038    | -0.585  | -0.3098 |       |
| 5-nonyl-5-ethyl barbituric acid  | 0.0899  |         | 0.42    | 0.0828   | 0.3222    | 0.5775  | 0.554  | 0.4983  | 0.8627   | 0.6758  | 0.3139    | 0.5478  | 0.4609  |       |
| 5-octyl-5-ethyl barbituric acid  | 0.0453  |         | 0.3444  | 0.1761   | 0.1673    | 0.5145  | 0.528  | 0.3032  | 0.7882   | 0.7284  | 0.444     | 0.2788  | 0.4116  |       |
| 5-pentyl-5-ethyl barbituric acid | 0.0414  |         | -0.1612 | 0.0294   | -0.0506   | -0.1427 | -0.119 | -0.2441 | 0.2304   | 0.2095  | 0.2279    | 0.017   | -0.1192 |       |
| 5-propyl-5-ethyl barbituric acid | 0.0969  |         | -0.0223 | 4.32E-03 | -0.0757   | 0.0334  | 0.053  | -0.0809 | -0.0605  | 0.29    | 0.4713    | -0.2076 | -0.1612 |       |
| Acebutolol                       | 0.6513  |         | -0.4089 | 0.6758   | 1.933     | 0.415   | 0.89   |         | -0.0757  | 1.4265  | 1.4314    |         |         | 1.53  |
| Alfentanyl                       | -0.2924 | -1.3979 | -0.6383 | -0.041   | 0.601     | -0.4685 | 0.111  | 0.1335  | 0.5988   | 0.2742  | 0.1903    |         | 0.2553  | 2.81  |
| Alprazolam                       | 0.3385  |         | 0.1987  |          | 0.1399    | 0.281   |        |         | 4.32E-03 | 0.8463  | 0.4249    |         |         | 3.02  |
| Barbital                         | -0.0862 |         | -0.1739 | -0.1367  | -0.2291   | -0.0809 | -0.071 | -0.1938 | -0.3468  | 0.3385  | 0.2279    | -0.5528 | -0.3279 | 1.45  |
| Betaxolol                        | 0.8376  |         | 0.8156  | 1.0531   | 1.2923    | 0.4997  | 1.988  |         | 0.1644   | 1.7796  | 1.4533    |         |         | 2.54  |
| Biperiden                        | 0.5224  | 0.8169  | 0.8382  | 0.8463   | 1.017     | 0.5809  | 1.753  |         | 1.7796   |         | 1.0086    |         |         | 3.54  |
| Bisoprolol                       | 0.5933  | 0.2923  | 0.0969  | 0.683    | 1.281     | 0.2068  | 1.489  |         | -0.1249  | 1.2253  | 1.2601    |         |         | 2.2   |
| Carvedilol                       | 0.1206  | 0.5328  |         | 0.7853   |           |         |        | 0.8222  |          | 0.932   | 0.716     |         |         | 3.42  |
| Cefazolin                        | -0.6576 |         |         | -0.7212  | -0.4089   | -0.2007 | -0.377 |         |          | 0.2788  | 0.8267    |         |         | 1.52  |
| Ceftazidime                      | -0.7212 | -0.6383 |         | -0.6576  | -0.3872   | -0.4089 | -0.357 |         | -0.7959  | -0.6021 | 0.6884    |         |         | -4.55 |
| Chlordiazepoxide                 | -0.2596 |         | -0.2757 | 0.2718   | 0.1492    | -0.4685 |        |         | 0.49     | 0.5416  | 0.2878    |         |         | 0.03  |
| Cisapride                        |         |         | 0.1461  | 0.238    |           |         | 0.988  |         |          | 1.1875  | 0.8189    |         |         | 2.49  |
| Cotinine                         | -0.1612 |         | -0.3468 | -0.2924  | -0.2218   |         | -0.237 |         | -1.0969  | -0.1938 | -4.36E-03 |         |         | 0.21  |

|                   |         |         |         |         |         |          |         |         |         |         |         |         |       |
|-------------------|---------|---------|---------|---------|---------|----------|---------|---------|---------|---------|---------|---------|-------|
| Decane            | 0.7202  |         | 1.0334  |         |         |          |         |         | 1.4216  | 1.0334  |         |         | 4.91  |
| Deltamethrin      | 1.5159  |         | 0.1106  |         | 0.4116  |          |         |         | 2.4579  | 0.4116  |         |         | 5.74  |
| Diazepam          | 0.3541  |         | 0.3096  | 0.6937  | 0.5911  | 0.7332   | 0.66    |         | 1.415   | 0.7966  | 0.6618  |         | 3.08  |
| Dicloxacillin     | -1.301  |         |         | -1.1549 |         |          | -0.921  | -1.0458 |         |         |         |         | 2.91  |
| Dideoxyinosine    | -0.1612 |         | -0.7696 |         | -0.2924 |          |         | -0.1739 |         | -0.1192 | 0.8357  | -0.1487 | 0.04  |
| Digoxin           | 0.0828  |         |         | 0.2068  | 0.7543  |          | 0.303   |         |         | 1.1644  | 0.2967  |         | 2.37  |
| Domperidone       | 0.4298  |         | -1.0458 | 0.48    |         |          | 0.901   |         |         | 1.0294  | 1.243   |         | 4.25  |
| Enoxacin          | 0.1875  |         |         | 0.0531  |         | 0.1584   | 0.083   | 0.238   |         | 0.5328  | 0.6902  |         | -0.98 |
| Etodolac          |         | 0.1847  | -1.0458 | -0.1938 |         |          |         |         | -0.6198 | -0.301  | -0.3188 |         | 3.44  |
| Fentanyl          | 0.5635  |         | 0.6212  | 0.7275  | 1.0128  | 0.4116   | 1.204   | 1.534   | 1.5198  | 0.6532  | 1.1553  | 1.4216  | 3.82  |
| Fingolimod        | 1.0212  |         | 1.692   | 1.2405  |         |          | 1.834   | 1.7931  |         | 1.6721  | 1.5539  |         | 4.06  |
| Fleroxacin        | 0.1903  |         |         | 0.2945  |         |          | 0.22    |         |         |         |         |         | 1.12  |
| Flunitrazepam     | -0.1192 | -0.0315 | 0.1367  | -0.0223 | 0.601   |          |         |         | 1.7723  | 0.48    | -0.4815 |         | 2.55  |
| Ftorafur          | -0.0458 |         | -0.1367 | -0.1612 | -0.1871 | -0.1427  | -0.337  | -0.1192 | -0.5086 | -0.1549 | 0.0899  | -0.4437 | 0.02  |
| Galanthamine      | 0.3118  |         | 0.1614  |         |         |          |         |         |         | 0.3856  | 1.1239  |         | 1.16  |
| Glycyrrhetic acid | -0.7447 |         | -1.1549 | -0.6778 |         |          | -0.5376 | -0.398  | -0.8861 |         |         |         | 6.03  |
| Glycyrrhizin      | -1      |         |         | -1.3979 |         |          | -0.5528 | -1      |         |         |         |         | 3.13  |
| Hexobarbital      | -0.1024 |         |         | 0.1139  | 0.1523  | -0.0362  | 0.449   |         | 0.2148  | 0.7752  | 0.179   |         | 1.25  |
| Imipramine        | 0.7218  |         | 1.1038  | 1.1173  | 1.1461  |          | 1.883   | 1.5353  | 0.7987  | 1.4914  | 1.4362  | 1.4166  | 4.28  |
| Inaperisone       | 0.3385  |         | 0.8156  | 0.5944  |         | 0.525    | 1.248   |         | 0.9159  | 1.2553  | 1.4886  |         | 3.57  |
| Laniquidar        | 0.9513  |         | 0.5587  | 0.8669  |         |          | 1.689   |         |         | 1.3263  | 1.179   |         | 6.28  |
| Lidocaine         | 0.1206  |         | 0.4065  | 0.3304  | 0.3892  | 0.3075   | 0.476   | 0.5763  |         | 0.9571  | 2.1303  |         | 0.92  |
| Lomefloxacin      | 0.2253  | 0.2148  | -0.6576 | 0.1523  | 0.2279  | -0.0132  | 0.111   | 0.2553  | -0.5686 | 0.3784  | 0.7024  |         | -0.39 |
| Lorcainide        | 0.3711  |         | 0.1004  | 0.382   |         |          | 1.207   |         |         | -0.3279 | 0.6739  |         | 4.31  |
| Lubeluzole        | 0.4281  |         | 0.7348  |         |         |          | 1.377   |         |         | 1.5611  | 1.1139  |         | 4.23  |
| Matrine           | 0.1271  |         | 0.3139  | 0.1875  | 0.49    |          | 0.188   | 0.8122  | -0.3372 | 0.7536  | 1.0128  |         | 1.08  |
| Metoprolol        | 0.5682  | 0.5391  | 0.6464  | 0.6365  | 0.902   | 0.3032   | 1.236   |         | -0.1805 | 1.4456  | 1.2455  |         | 1.76  |
| Midazolam         | 0.1139  |         | 0.4757  | 0.4814  | 0.4829  | 0.4249   | 0.513   | 0.3692  | 0.776   | 1.0531  | 0.5079  | 0.4871  | 3.97  |
| Miloxacin         |         |         | -0.9208 |         |         |          | -0.292  | -0.4815 |         |         |         |         | 1.15  |
| Molinate          | 0.6201  |         |         |         |         |          |         |         | 2.2504  | 1.1492  |         |         | 1.89  |
| Nalidixic acid    | -0.4559 | -0.5528 | -0.6778 | -0.3188 | -0.3188 | -0.4685  | -0.495  | -0.4815 | -1.0458 | -0.2441 | -0.2757 |         | 1.01  |
| Nebivolol         | 0.3617  |         | 0.4639  | 0.5647  |         |          | 1.891   |         |         | 1.0414  | 0.918   |         | 3.21  |
| Nicotine          | 0.2175  |         | 0.4378  | 0.2355  | 0.301   | 0.1072   | 0.243   |         | -0.3279 | 0.6821  | 1.2504  |         | 1.16  |
| o-Ethoxybenzamide | -0.1024 |         | -0.0269 | 0       | -0.2441 | 4.32E-03 | -0.036  | -0.0655 | -0.1549 |         | 0.1106  |         | 1.02  |
| Ofloxacin         | 0.2695  | 0.1875  | -0.6021 | 0.2856  |         |          | 0.1106  | 0.167   | 0.3201  | -0.699  | 0.3444  | 0.8414  | 0.65  |
| Oxprenolol        | 0.6551  | 0.4409  | 0.3747  | 0.7218  | 1.2095  | 0.3032   | 1.384   |         | -0.0809 | 1.1303  | 1.3139  |         | 2.17  |
| Pefloxacin        | 0.4099  |         | -0.7696 | 0.3979  |         |          | 0.314   | 0.5599  |         | 0.7543  | 0.6425  |         | 0.88  |
| Penicillin        | -0.9586 |         |         | -0.7696 | 0.243   |          | -0.553  | -0.7696 |         | -0.3468 | 0.828   |         | 1.08  |
| Pentacocine       | 0.6149  | 0.5798  | 0.4829  | 0.5798  | 0.5119  | 0.5119   | 1.279   |         | 0.2405  | 0.243   | 1.1818  |         | 3.89  |
| Perchloroethylene | 0.2648  |         | 0.4728  |         |         |          |         |         | 2.0719  | 0.4099  | 0.3802  |         | 2.62  |
| Phencyclidine     | 0.1303  |         | 0.3598  | 0.29    |         |          | 1.562   |         | 1.7396  | 0.8555  | 1.0212  |         | 4.49  |
| Phenobarbital     | -0.0862 |         |         | -0.0915 | 0.1072  | 4.32E-03 | -0.201  |         | -0.6383 | 0.1818  | -0.2147 |         | 2.14  |
| Phenytoin         | -0.0969 |         | -0.1427 | -0.0969 | 0.1903  | 0.0414   | -0.125  |         | 0.2175  | 0.3579  | 0.1987  |         | 3.4   |

|                      |         |         |         |         |         |         |        |         |         |         |         |  |         |       |
|----------------------|---------|---------|---------|---------|---------|---------|--------|---------|---------|---------|---------|--|---------|-------|
| Pindolol             | 0.7745  | 0.29    | 0.5944  | 0.9652  | 1.243   | 0.3324  | 1.393  |         | -0.2218 | 0.9455  | 1.49    |  |         | 1.69  |
| Pipemidic acid       | 0.1461  | 0.3784  | -0.8861 | 0       |         |         | 0.068  | 0.1875  | -0.4437 | 0.6893  | 0.8965  |  |         | -1.77 |
| p-Phenylbenzoic acid | -0.8539 |         | -1      | -0.3872 | -0.5686 | -0.5686 | -0.301 | -0.7447 |         |         |         |  |         | 3.28  |
| Procainamide         | 0.49    |         |         | 0.3909  |         |         |        |         | -0.9208 | 0.5011  | 0.8028  |  |         | 0.95  |
| Propranolol          | 0.6628  | 0.6739  | 1.238   | 0.9657  | 1.2833  | 0.5623  | 1.762  |         | 0.2989  | 1.29    | 1.1303  |  |         | 2.58  |
| Prucalopride         | 0.4771  |         | -0.5528 | 0.4502  |         |         | 0.843  |         |         | 0.7604  | 1.0607  |  |         | 0.74  |
| Pseudocumene         | 0.0828  |         | 0.4031  |         |         |         |        |         | 1.7973  | 0.4031  |         |  |         | 3.51  |
| Quinidine            | 0.4857  |         | -0.1938 | 0.617   | 0.8579  |         | 1.486  | 1.2304  |         | 1.0682  | 1.1673  |  |         | 2.51  |
| Ritanserin           | 0.6075  |         | 0.4698  |         |         |         | 1.508  |         |         | 1.3979  | 1.1492  |  |         | 5.31  |
| Sabeluzole           |         |         | 0.8055  |         |         |         | 1.54   |         |         | 1.6513  | 1.0899  |  |         | 4.09  |
| Salicylic acid       | -0.6021 | -0.585  | -1.0458 | -0.4685 | -0.4202 | -0.3098 | -0.456 |         |         | -0.3768 | -0.0915 |  |         | 1.98  |
| Styrene              | -0.0655 |         |         |         |         |         | -0.194 |         | 1.6117  | 0.0719  |         |  |         | 2.71  |
| Sufentanyl           | 0.3927  |         | 0.4771  | 0.415   |         |         | 0.951  |         |         | -0.1739 | 0.2279  |  |         | 3.61  |
| Tenoxicam            | -1.0969 | -1      | -2      | -0.7447 | -0.699  | -0.8239 | -0.509 | -1.1549 | -1.5229 | 0.0607  | 0.017   |  | -0.9208 | 1.22  |
| Tetracycline         | 0.301   | 0.9504  |         |         | 0.574   |         |        |         | 0.0414  | 0.6721  | 0.6075  |  |         | -3.47 |
| Theophylline         | -0.2147 |         | -0.4437 |         |         |         | -0.143 |         |         |         |         |  |         | -0.81 |
| Thiopental           | -0.1427 |         | -0.1308 | 0.0792  | 0.1335  | 0.1492  | 0.124  | -0.2147 | 0.8169  | 0.5302  | 0.4133  |  | 0.0253  | 2.78  |
| Timolol              | 0.5763  | -0.0458 | -0.0177 | 0.6866  | 1.2625  | 0.1553  | 1.389  |         | -0.2366 | 0.8579  | 1.0828  |  |         | 1.34  |
| Tolbutamide          | -0.8239 |         | -0.9586 | -0.4815 | -0.8539 | -0.5528 | -0.482 | -0.6576 | -0.8539 | -0.7696 | -0.7959 |  | -0.7447 | 3.11  |
| Triazolam            | 0.6064  |         |         |         | 0.902   | 0.5635  |        |         | 0.6064  | 0.3997  | 0.752   |  |         | 3.63  |
| Valproic acid        | -0.6778 |         | -0.4685 | -0.2366 | -0.2147 | -0.1938 | -0.244 |         | -0.699  | 0.3909  | 0.3118  |  |         | 2.8   |
| Verapamil            | 0.6138  |         |         | 0.8482  |         |         | 1.769  |         |         |         | 1.1673  |  |         | 5.04  |

## References

1. Endo S, Brown TN, Goss KU. General model for estimating partition coefficients to organisms and their tissues using the biological compositions and polyparameter linear free energy relationships. *Environ Sci Technol* 2013; 47:6630-9.
2. Paixao P, Aniceto N, Gouveia LF, Morais JAG. Tissue-to-blood distribution coefficients in the rat: Utility for estimation of the volume of distribution in man. *European Journal of Pharmaceutical Sciences* 2013; 50:526-43.
